# Supplementary material for: Effects of a Novel Convection Heated Roasting Method on Aroma and Umami Taste Components of Vegetable- and Meat-Based Extracts
Source: Hindawi journal article supplement (doi:10.1155/2022/7690831), 2022-02-25
Supplement: f1 [file 7690831.f1.pdf]

|    | Library Compound name                                                 | CAS#        | Green onion extract |          | Garlic extract |          | Beef bone extract |          | Chicken_bone extract |          | Shrimp extract |          | Blue crab extract |          | control | injection | overheated ste |
|----|-----------------------------------------------------------------------|-------------|---------------------|----------|----------------|----------|-------------------|----------|----------------------|----------|----------------|----------|-------------------|----------|---------|-----------|----------------|
|    |                                                                       |             | Non-roast           | Roasting | Non-roast      | Roasting | Non-roast         | Roasting | Non-roast            | Roasting | Non-roast      | Roasting | Non-roast         | Roasting |         |           |                |
| 1  | 2,5-hexanedione                                                       | 000110-13-4 | -                   | -        | -              | -        | -                 | -        | -                    | -        | 18036          | 16712    | -                 | -        | -       | -         | -              |
| 2  | 2h-1,4-benzodiazepin-2-one, 7-chlo                                    | 055299-24-6 | -                   | -        | -              | -        | -                 | -        | -                    | -        | -              | -        | -                 | -        | -       | -         | -              |
| 3  | 3-methyl-2,3-dipropylthiazidin-1-carboxylate                          | 159104-49-7 | -                   | -        | -              | -        | -                 | -        | -                    | -        | 7436           | -        | -                 | -        | -       | -         | -              |
| 4  | [1,5,2]-2-acetyl-1-methyl-1-vinylcyclobutane                          | 999047-71-6 | -                   | -        | -              | -        | -                 | -        | -                    | -        | -              | -        | -                 | -        | -       | -         | 494740         |
| 5  | [2e,4c]-4-[[t-butoxycarbonyl(amino)-2-penten-1-ol                     | 999182-27-9 | -                   | -        | -              | -        | -                 | -        | -                    | -        | -              | -        | -                 | -        | -       | -         | -              |
| 6  | [2e,6e]-2-methyl-[1,8-(2h)4]octa-2,6-dien-1,8-diol                    | 999079-73-1 | -                   | -        | -              | -        | -                 | 13066    | -                    | -        | -              | -        | -                 | -        | 416813  | -         | -              |
| 7  | [3n^5n^]-2,6-dimethyl-3,5-heptanediol                                 | 999086-47-7 | -                   | -        | -              | -        | -                 | -        | -                    | -        | -              | -        | -                 | -        | -       | -         | 662555         |
| 8  | [4,5-dimethoxy-2-(trimethylsilyl)benzyl]trimethylsilane               | 106544-58-5 | 75272               | -        | -              | -        | -                 | -        | -                    | -        | -              | -        | -                 | -        | -       | -         | -              |
| 9  | [5e,7z]-4-oxanona-5,7-dien-1-ol                                       | 999053-92-6 | -                   | -        | -              | -        | -                 | 18336    | -                    | -        | -              | -        | -                 | -        | -       | -         | -              |
| 10 | [chlorodimethylsilyl]fluorodimethylsilylbis(trimethylsilyl)methane    | 999585-99-3 | -                   | -        | -              | -        | -                 | -        | -                    | -        | -              | -        | -                 | -        | -       | -         | 4807388        |
| 11 | [o-dithienol]                                                         | 090134-18-2 | -                   | -        | -              | -        | -                 | 2141     | -                    | -        | -              | -        | -                 | -        | -       | -         | -              |
| 12 | [p-(n-n-dibenzylamino)-3-chloro-1,1,1-trifluoropropane                | 999524-60-3 | -                   | -        | -              | -        | -                 | 3712     | -                    | -        | -              | -        | -                 | -        | -       | -         | -              |
| 13 | [rs]-4-heptyn-2-ol                                                    | 090134-40-0 | -                   | -        | -              | -        | -                 | -        | -                    | -        | -              | -        | -                 | -        | 378192  | -         | -              |
| 14 | [rs]-n-hexadecyl trifluoromethyl carbinol                             | 999517-83-3 | -                   | -        | -              | 16065    | -                 | -        | -                    | -        | -              | -        | -                 | -        | -       | -         | -              |
| 15 | [s]-(-)-2-hexylthirane                                                | 999057-37-6 | -                   | -        | -              | -        | -                 | -        | -                    | -        | -              | -        | -                 | -        | 1691385 | -         | -              |
| 16 | tert-butoxymethylloxirane                                             | 007665-72-7 | -                   | -        | -              | -        | -                 | -        | -                    | 106727   | 82447          | -        | 95061             | -        | -       | -         | -              |
| 17 | transi-2-nonadecene                                                   | 999366-32-6 | -                   | -        | -              | -        | -                 | -        | -                    | -        | -              | -        | -                 | -        | -       | 1285795   | -              |
| 18 | [2i]-1-iodo-9-octadecene                                              | 999626-41-6 | -                   | -        | -              | -        | -                 | -        | -                    | -        | -              | -        | 27504             | -        | -       | -         | -              |
| 19 | [2]-4-bromo-3-decen-2-ol                                              | 138857-30-4 | -                   | -        | -              | -        | -                 | -        | -                    | 11221    | -              | -        | -                 | -        | -       | -         | -              |
| 20 | [2]-9-tetradecumul nitrate                                            | 999339-60-1 | -                   | -        | -              | -        | -                 | -        | -                    | -        | -              | -        | -                 | -        | -       | 873617    | -              |
| 21 | +/-,-2-methoxy-3,8-dioxocephalotax-1-ene                              | 114942-83-5 | -                   | -        | -              | -        | -                 | -        | -                    | -        | -              | -        | -                 | -        | 1662175 | -         | -              |
| 22 | 1-(1',3'-thiazol-2'-yl)-2-propylacetylene                             | 999068-19-8 | -                   | -        | -              | -        | -                 | -        | -                    | -        | -              | -        | -                 | -        | -       | 30807393  | -              |
| 23 | 1-(1-naphthyl)-1h-1,2,3-benzotriazole-5,6-dicarbonitrile              | 999444-32-3 | -                   | -        | -              | -        | 74659             | -        | -                    | -        | -              | -        | -                 | -        | -       | -         | -              |
| 24 | 1-(2-hydroxyethoxy)-2-methylodecane                                   | 999303-80-4 | -                   | 9450     | -              | -        | -                 | -        | -                    | -        | -              | -        | -                 | -        | -       | -         | -              |
| 25 | 1-(2-thienylethanone semicarbazone dtms                               | 999524-19-7 | -                   | -        | -              | -        | -                 | -        | -                    | -        | -              | -        | -                 | -        | 974666  | -         | -              |
| 26 | 1-(2-trimethylsiloxy-1,1-dideuteriovinyl)-4-trimethylsiloxy-benzene   | 126210-55-7 | -                   | -        | -              | -        | -                 | -        | -                    | -        | -              | -        | -                 | -        | -       | 915040    | -              |
| 27 | 1,4-dimethoxy-2-methylphenyl-ethanol                                  | 066198-31-6 | -                   | -        | -              | -        | -                 | -        | -                    | -        | -              | -        | -                 | -        | -       | 739317    | -              |
| 28 | 1-(heptyl)cyclopentan-1-ol                                            | 999131-37-6 | -                   | -        | -              | -        | -                 | -        | -                    | -        | -              | -        | -                 | -        | 152157  | -         | -              |
| 29 | 1,1,1,2-tetrafluoro-2-tridecene                                       | 108377-18-0 | -                   | -        | -              | -        | -                 | -        | -                    | -        | -              | -        | 14865             | -        | -       | -         | -              |
| 30 | 1,1,1,3,5,7,9,9,9-nonamethylpentasioxane                              | 084409-41-6 | 13330               | -        | -              | -        | -                 | -        | 10850                | -        | 7638           | -        | -                 | -        | -       | -         | 632538         |
| 31 | 1,2-benzisothiazol-3-amine dtms                                       | 999358-15-8 | -                   | -        | 49334          | -        | -                 | -        | -                    | -        | -              | -        | -                 | -        | -       | -         | -              |
| 32 | 1,2-epoxy-5,9-cyclododecadene                                         | 000943-93-1 | -                   | -        | -              | -        | -                 | -        | -                    | -        | -              | -        | -                 | -        | -       | -         | 2760456        |
| 33 | 1,3,2-dioxaborolane, 2-ethyl-4-(3-oxiranylpropyl)-                    | 074810-66-5 | -                   | -        | -              | -        | -                 | -        | -                    | -        | 8609           | -        | -                 | -        | -       | -         | -              |
| 34 | 1,3,5-heptatriene, (e,e)-                                             | 017679-93-5 | -                   | -        | -              | -        | -                 | -        | -                    | -        | -              | -        | -                 | -        | -       | -         | 342511         |
| 35 | 1,3,5-trimethylbenzene, 2,2'-dithiobis-                               | 001483-82-7 | -                   | -        | -              | -        | -                 | -        | -                    | -        | -              | -        | -                 | -        | -       | 6814482   | -              |
| 36 | 1,3-cyclooctadiene                                                    | 001700-10-3 | -                   | -        | -              | -        | -                 | -        | -                    | -        | -              | -        | -                 | -        | -       | -         | 4861013        |
| 37 | 1,3-cyclopentadiene, 5-(1-methylethylidene)-                          | 002175-91-9 | -                   | -        | -              | -        | -                 | -        | -                    | -        | -              | -        | 30374             | -        | -       | -         | -              |
| 38 | 1,3-dihydroxy-6-methoxy-1,2,3,4-tetrahydroquinolin-2-one              | 999204-20-6 | -                   | -        | -              | 19588    | -                 | -        | -                    | -        | -              | -        | 13323             | -        | -       | -         | -              |
| 39 | 1,3-diphenyl-5-methylthio-1,2,4-triazole                              | 051384-17-9 | 69956               | -        | -              | -        | -                 | -        | -                    | -        | -              | -        | -                 | -        | -       | -         | -              |
| 40 | 1,3-propanediol, 2,2'-(oxybis(methylene))bis(2-(hydroxymethyl)-       | 000126-58-9 | -                   | -        | -              | -        | -                 | -        | -                    | -        | 8304           | -        | -                 | -        | -       | -         | -              |
| 41 | 1,4-benzodioxan-6-amine                                               | 022013-33-8 | -                   | -        | -              | -        | -                 | -        | -                    | -        | -              | -        | -                 | -        | -       | 10394857  | -              |
| 42 | 1,4,7,10,13,16,19-heptaosa-2-cycloheicosanone                         | 083410-52-0 | -                   | -        | -              | -        | -                 | -        | -                    | -        | 3066           | -        | -                 | -        | -       | -         | -              |
| 43 | 1,4,7,10,13,16-hexaoxaocyclodecane                                    | 017455-13-9 | 26820               | -        | -              | -        | -                 | -        | 12445                | -        | 10058          | -        | -                 | -        | -       | -         | 1281722        |
| 44 | 1,4,7,10,13,16-pentaoxacyclodecane, 2-phenyl-                         | 068756-67-2 | -                   | -        | -              | -        | -                 | -        | -                    | -        | -              | -        | -                 | -        | 1288263 | -         | -              |
| 45 | 1,4-methanoazulen-7(1h)-one, octahydro-4,8,8,9-tetramethyl-           | 999236-14-6 | -                   | -        | -              | -        | -                 | -        | -                    | -        | -              | -        | -                 | -        | 1343649 | -         | -              |
| 46 | 1,4-octadiene                                                         | 005675-25-2 | -                   | -        | -              | -        | -                 | -        | -                    | -        | -              | -        | -                 | -        | -       | -         | 2339079        |
| 47 | 1,5-bisoxiranylpentane                                                | 999079-71-7 | -                   | -        | -              | -        | -                 | -        | -                    | -        | -              | -        | -                 | -        | -       | -         | 689212         |
| 48 | 1,5-diphenyl-3-methylthio-1,2,4-triazole                              | 072234-23-2 | -                   | -        | -              | -        | -                 | -        | -                    | -        | -              | -        | -                 | -        | -       | 1176081   | -              |
| 49 | 1,8-cineole                                                           | 000470-82-6 | -                   | -        | -              | 11323    | -                 | -        | -                    | -        | -              | -        | -                 | -        | -       | -         | -              |
| 50 | 1,8-epoxy-p-menth-2-ene                                               | 092760-25-3 | -                   | -        | -              | -        | -                 | -        | -                    | -        | -              | -        | -                 | -        | 1201022 | -         | -              |
| 51 | 10-methoxy-3.alpha.-4.alpha.-epoxy-carane                             | 999135-96-5 | -                   | -        | -              | -        | -                 | -        | -                    | -        | -              | -        | -                 | -        | -       | -         | -              |
| 52 | 11-beta-11-ethenyl-21-chloro-17.alpha.,20z)-19-norpregna-1,3,5(10),20 | 999591-48-1 | 24363               | -        | -              | -        | -                 | -        | -                    | -        | -              | -        | 28287             | -        | -       | 614317    | 2263555        |
| 53 | 11-dodecen-1-ol trifluoroacetate                                      | 128792-46-1 | -                   | -        | -              | -        | -                 | -        | -                    | -        | -              | -        | -                 | -        | -       | 1891255   | -              |
| 54 | 12-nonylphenyl-3,6,9,12-tetraoxadodecanol, mix of isomers             | 027176-97-2 | -                   | -        | -              | -        | -                 | -        | 24691                | -        | -              | -        | -                 | -        | -       | -         | 4297791        |
| 55 | 13-tetradec-11-yn-1-ol                                                | 999203-20-2 | -                   | -        | -              | -        | -                 | -        | -                    | -        | -              | -        | -                 | -        | 4237881 | -         | -              |
| 56 | 14-beta-h-pregna                                                      | 999427-17-9 | -                   | -        | -              | -        | -                 | -        | -                    | -        | -              | -        | -                 | -        | 967910  | -         | -              |
| 57 | 15-crown-5                                                            | 033100-27-5 | -                   | -        | -              | -        | -                 | -        | -                    | -        | -              | -        | -                 | -        | -       | -         | 425208         |
| 58 | 1-allyl-2,8-dimethoxy-9h-carbazole                                    | 103763-37-7 | -                   | -        | 391634         | -        | -                 | -        | -                    | -        | -              | -        | -                 | -        | -       | -         | -              |
| 59 | 1-azido-2-(propenyl)benzene                                           | 999084-70-6 | -                   | -        | -              | -        | -                 | -        | -                    | 17303    | -              | -        | -                 | -        | -       | -         | -              |
| 60 | 1-bromo-3-(2-bromomethyl)-nonane                                      | 070308-49-3 | -                   | -        | -              | -        | -                 | -        | -                    | -        | -              | -        | -                 | -        | -       | -         | -              |
| 61 | 1-butanol, 2-ethyl-                                                   | 000097-95-0 | -                   | -        | -              | -        | -                 | -        | -                    | -        | 8110           | -        | -                 | -        | 618323  | -         | -              |
| 62 | 1-butanol, 3-methyl-, (impure)                                        | 000123-51-3 | -                   | -        | -              | -        | -                 | -        | 37980                | -        | -              | -        | -                 | -        | -       | -         | -              |
| 63 | 1-butylpentyl trifluoromethanesulfonate                               | 999390-94-8 | -                   | -        | -              | -        | 2566              | -        | -                    | -        | -              | -        | -                 | -        | -       | -         | -              |
| 64 | 1-cyclopropyl-2-undecen-1-one                                         | 999203-30-7 | -                   | -        | -              | -        | -                 | -        | -                    | -        | -              | -        | -                 | -        | -       | 13509421  | -              |
| 65 | 1-dimethyloctylsilyloctadecane                                        | 999706-53-0 | -                   | -        | -              | -        | -                 | -        | -                    | -        | -              | 8159     | -                 | -        | -       | -         | -              |
| 66 | 1-dodecene                                                            | 000112-41-4 | -                   | -        | -              | -        | -                 | -        | -                    | -        | -              | -        | -                 | -        | 383398  | -         | -              |
| 67 | 1-ethanol, 2-[(3,5-dinitrophenyl)thio]-                               | 999201-09-9 | 10467               | -        | -              | -        | -                 | -        | -                    | -        | -              | -        | -                 | -        | -       | -         | -              |
| 68 | 1-ethyl-2-pyrazoline                                                  | 999988-98-8 | -                   | -        | -              | -        | -                 | -        | -                    | -        | -              | -        | -                 | -        | -       | -         | 564328         |
| 69 | 1-fluorooxonane                                                       | 000463-18-3 | -                   | -        | -              | -        | -                 | -        | -                    | -        | -              | -        | -                 | -        | 310709  | -         | -              |
| 70 | 1-heptanol                                                            | 000111-70-6 | -                   | -        | 25801          | 56101    | 90639             | 23015    | 125555               | -        | -              | -        | -                 | -        | -       | -         | -              |
| 71 | 1-heptanol, 2-propyl-                                                 | 010042-59-8 | -                   | -        | -              | 16027    | -                 | -        | 9052                 | -        | -              | -        | -                 | -        | -       | -         | -              |
| 72 | 1-heptene                                                             | 000592-76-7 | -                   | 8036     | -              | -        | -                 | -        | -                    | -        | -              | -        | -                 | -        | -       | -         | -              |
| 73 | 1-heptene, 6-methyl-                                                  | 005026-76-6 | -                   | -        | -              | -        | 16834             | -        | -                    | -        | -              | -        | -                 | -        | -       | -         | -              |
| 74 | 1-hexacosanol                                                         | 000506-52-5 | -                   | -        | -              | -        | -                 | -        | 19616                | -        | -              | -        | -                 | -        | -       | -         | -              |
| 75 | 1-hexanol                                                             | 000111-27-3 | -                   | -        | -              | -        | 10631             | -        | 20067                | -        | -              | -        | -                 | -        | -       | -         | -              |
| 76 | 1-hexanol, 2-ethyl-                                                   | 000104-76-7 | -                   | -        | -              | -        | 57738             | 91897    | 88107                | 82083    | 80712          | 164572   | 179766            | -        | -       | -         | -              |
| 77 | 1-hexen-3-one                                                         | 001629-60-3 | 58105               | 44437    | -              | 762532   | 81340             | 57738    | 92239                | -        | -              | -        | -                 | -        | -       | -         | -              |
| 78 | 1-hexene, 3,4-dimethyl-                                               | 016745-94-1 | -                   | -        | -              | -        | -                 | -        | -                    | -        | -              | -        | -                 | -        | -       | 534443    | -              |
| 79 | 1-hexene, 3-methyl-                                                   | 003404-61-3 | -                   | -        | -              | 61962    | -                 | -        | -                    | -        | -              | -        | -                 | -        | -       | -         | -              |
| 80 | 1h-trindene, 2,3,4,5,6,7,8,9-octahydro-1,4,4,9,9-hexamethyl-          | 055682-87-6 | -                   | -        | -              | -        | -                 | -        | -                    | -        | 92831          | -        | -                 | -        | -       | -         | -              |
| 81 | 1-hydroxy-4,4-dimethylcyclohexanecarbonitrile                         | 999072-99-4 | -                   | -        | 32924          | -        | -                 | -        | -                    | -        | -              | -        | -                 | -        | -       | -         | -              |
| 82 | 1-hydroxyundecan-10-one                                               | 999145-50-9 | -                   | 25643    | -              | -        | -                 | -        | -                    | -        | -              | -        | 11021             | -        | -       | -         | -              |
| 83 | 1-iodo-2-methylundecane                                               | 073105-67-6 | -                   | -        | -              | -        | -                 | -        | 235243               | -        | -              | -        | -                 | -        | -       | -         | -              |
| 84 | 1-iodoundecane                                                        | 004082-44-4 | -                   | -        | -              | -        | 4915              | -        | -                    | -        | -              | -        | -                 | -        | -       | -         | -              |
| 85 | 1-methoxy-1,3-cyclohexadiene                                          | 002161-90-2 | -                   | -        | -              | -        | -                 | -        | -                    | -        | -              | -        | -                 | -        | 1182935 | -         | -              |
| 86 | 1-methoxy-4-(phenylethynyl)benzene                                    | 999203-49-2 | -                   | -        | -              | -        | -                 | -        | -                    | -        | 114739         | -        | -                 | -        | -       | -         | -              |
| 87 | 1-methyldecahydronaphthalene                                          | 002958-75-0 | -                   | -        | -              | -        | -                 | -        | -                    | -        | -              | -        | -                 | -        | 798374  | -         | -              |
| 88 | 1-nonanol                                                             | 000143-08-8 | -                   | -        | -              | -        | -                 | 48013    | -                    | -        | -              | -        | -                 | -        | -       | -         | -              |
| 89 | 1-octanol                                                             | 000111-87-5 | -                   | -        | -              | -        | 88362             | 104638   | 125351               | -        | -              | -        | 13371             | -        | -       | -         | -              |
| 90 | 1-octanol, 2-butyl-                                                   | 003913-02-8 | -                   | -        | -              | -        | -                 | 7679     | -                    | -        | -              | -        | -                 | -        | -       | -         | -              |
| 91 | 1-octen-3-ol                                                          | 053907-72-5 | -                   | -        | 35653          | 35069    | 30426             | -        | 343264               | -        | -              | -        | -                 | -        | -       | -         | -              |
|    |                                                                       |             |                     |          |                |          |                   |          |                      |          |                |          |                   |          |         |           |                |

[illegible]

[illegible]

[illegible]

[illegible]
